# Supplementary material for: High prevalence of the MLH1 V384D germline mutation in patients with HER2-positive luminal B breast cancer
Source: PubMed Central journal article supplement (PMC6662670; doi:10.1038/s41598-019-47439-3), 2019-07-29
Supplement: 41598_2019_47439_MOESM1_ESM.pdf [file 41598_2019_47439_MOESM1_ESM.pdf]

## Supplementary Figures

### High prevalence of the *MLH1* V384D germline mutation in patients with HER2-positive luminal B breast cancer

Seung Eun Lee<sup>1</sup>, Hye Seung Lee<sup>1</sup>, Kyoung-Yeon Kim<sup>2</sup>, Jung-Hoon Park<sup>2</sup>, Hanseong Roh<sup>2</sup>,  
Ha Young Park<sup>3\*</sup>, Wan-Seop Kim<sup>1\*</sup>

<sup>1</sup>Department of Pathology, Konkuk University Medical Center, Konkuk University School of Medicine, Seoul, Republic of Korea

<sup>2</sup>Precision Medicine Institute, MacroGen, Inc

<sup>3</sup>Department of Pathology, Busan Paik Hospital, Inje University College of Medicine, Busan, Korea

**Corresponding authors:** [wskim@kuh.ac.kr](mailto:wskim@kuh.ac.kr), [pmint00@naver.com](mailto:pmint00@naver.com)

**Supplementary Figure 1. Comparing mutation rate of *PIK3CA* and *TP53* with large-scale studies.**

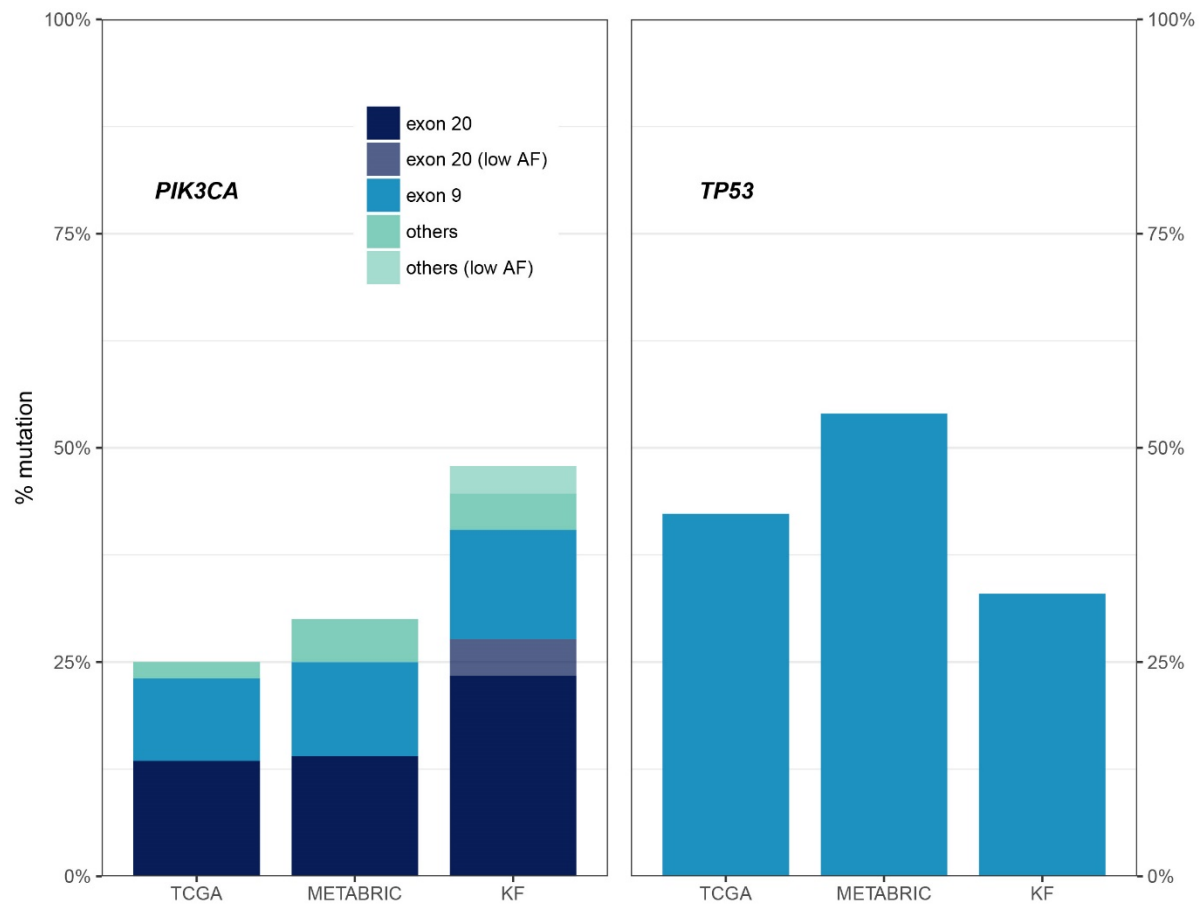

Bar plots represent mutation rate in HER-2-positive luminal B breast cancer of TCGA, METABRIC, and present study (KF). Different mutation loci of *PIK3CA* are distinguished by different colors.

**Supplementary Figure 2. Details of *PIK3CA* mutations in three populations.**

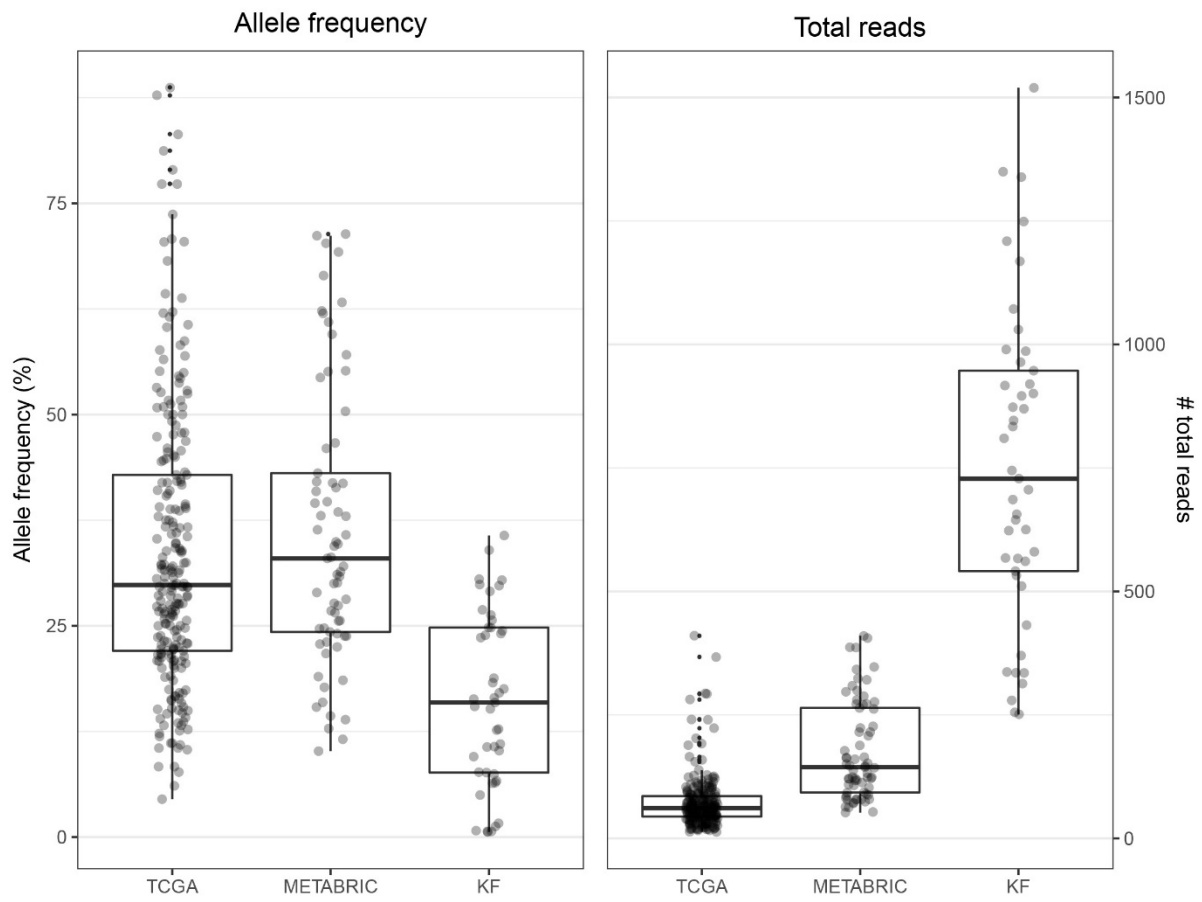

Variant allele frequencies and total reads of *PIK3CA* mutations of TCGA, METABRIC, and present study (KF) are summarized by bar plot, and each dot represent mutated cases.
